# Supplementary material for: Doping-driven electronic structure and conductivity modification of nickel sulfide
Source: Royal Society of Chemistry journal article supplement (doi:10.1039/d2dt00363e), 2022-01-01
Supplement: d2dt00363e1.pdf [file d2dt00363e1.pdf]

# Doping-driven electronic structure and conductivity modification of nickel sulfide

Zhenyun Xiao<sup>a,b</sup>, Lijin Yan<sup>a,b</sup>, Qin Hu<sup>a,b</sup>, Bin Xiang<sup>a,b,\*</sup>, Yu Wang<sup>d</sup>, Jiangyu Hao<sup>a,b</sup>, Xuefeng Zou<sup>c,\*</sup>, Weining Li<sup>a,b</sup>, Shicheng Wei<sup>e,\*</sup>

<sup>a</sup> *School of Chemistry and Chemical Engineering, Chongqing University, Chongqing 401331, P.R. China*

<sup>b</sup> *National-municipal Joint Engineering Laboratory for Chemical Process Intensification and Reaction, Chongqing 400044, P.R. China.*

<sup>c</sup> *Guizhou Provincial Key Laboratory of Computational Nano-Material Science, Guizhou Education University, Guiyang 550018, P.R. China*

<sup>d</sup> *School of Chemistry and Materials Science, Guizhou Education University, Guiyang 550018, P.R. China.*

<sup>e</sup> *National Key Laboratory for Remanufacturing, Army Academy of Armored Forces, Beijing 100072, P.R. China.*

*\*Corresponding author.*

*Email address: xiangbin@cqu.edu.cn (Bin Xiang), njzouxf@gznc.edu.cn (Xuefeng Zou), wsc33333@163.com (Shicheng Wei)*

1. Relationship between real impedance and  $\omega^{-1/2}$  of NS, CoNS, MnNS and AgNS Electrode in the low-frequency region is liner fitted.

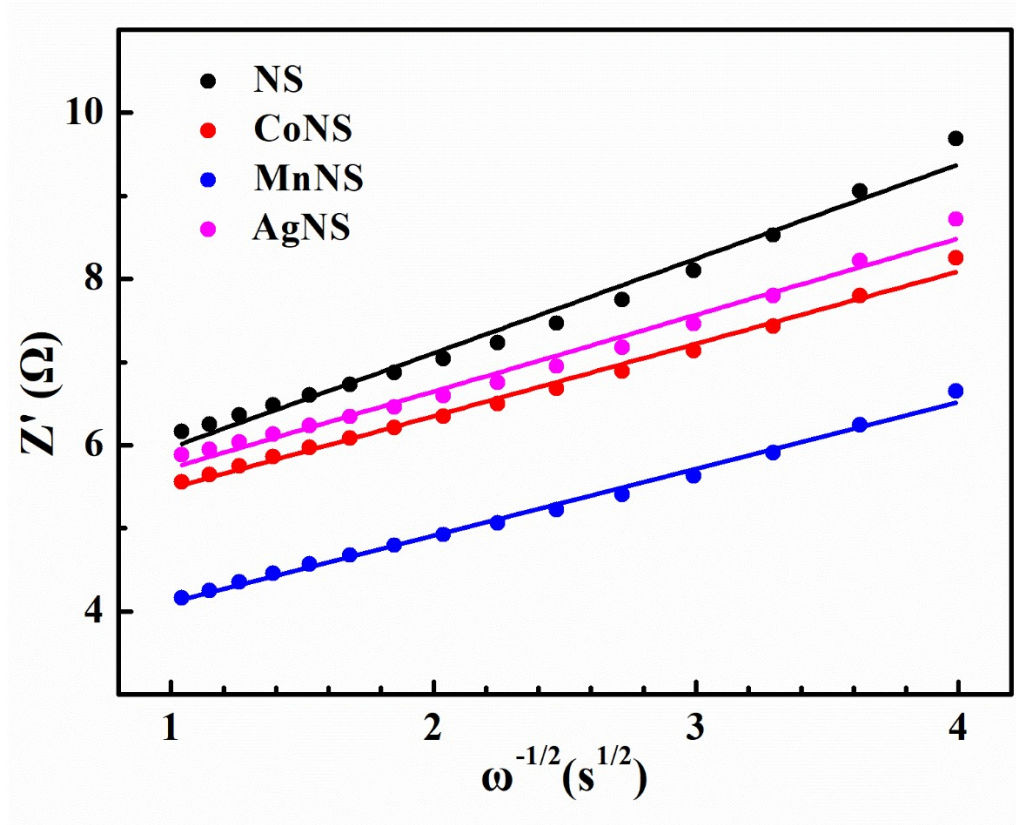

**Fig. S1** Relationship between real impedance and reciprocal square root of lower angular frequencies

2. Dopant concentration in synthesized samples are detected by ICP-AES.

**Table S1** Doped samples composition from ICP-AES

| Sample           | 2% CoNS |       | 0.5% MnNS |       | 0.5% AgNS |       |
|------------------|---------|-------|-----------|-------|-----------|-------|
| Element          | Ni      | Co    | Ni        | Mn    | Ni        | Ag    |
| Mass fraction(%) | 40.88%  | 1.02% | 26.14%    | 0.09% | 23.12%    | 0.23% |

|                                             |       |       |       |
|---------------------------------------------|-------|-------|-------|
| Atomic ratio of<br>transition metals: Ni(%) | 2.48% | 0.36% | 0.54% |
|---------------------------------------------|-------|-------|-------|

3. Ni 2P binding energy of fitted peaks is shown below.

**Table S2** Ni 2P binding energy of fitted peaks

| Sample    | Ni 2P <sub>3/2</sub> |                  |           | Ni 2P <sub>1/2</sub> |                  |           |
|-----------|----------------------|------------------|-----------|----------------------|------------------|-----------|
|           | Ni <sup>2+</sup>     | Ni <sup>3+</sup> | Sat.      | Ni <sup>2+</sup>     | Ni <sup>3+</sup> | Sat.      |
| NS        | 853.43 eV            | 856.60 eV        | 860.85 eV | 870.49 eV            | 874.30 eV        | 879.33 eV |
| 2% CoNS   | 853.86 eV            | 856.51 eV        | 860.61 eV | 871.46 eV            | 874.66 eV        | 879.24 eV |
| 0.5% MnNS | 854.19 eV            | 856.45 eV        | 860.51 eV | 871.62 eV            | 874.87 eV        | 879.58 eV |
| 0.5% AgNS | 853.98 eV            | 856.12 eV        | 860.53 eV | 871.54 eV            | 874.70 eV        | 879.32 eV |

4. The parameters of model in the equivalent circuit are simulated and listed in Table S3.

**Table S3** Kinetic Parameters of NS, CoNS, MnNS and AgNS Electrode

| Sample    | R <sub>s</sub> | R      | R <sub>ct</sub> | σ <sub>w</sub>           | D <sub>K</sub> <sup>+</sup>                             |
|-----------|----------------|--------|-----------------|--------------------------|---------------------------------------------------------|
| NS        | 0.12 Ω         | 0.18 Ω | 4.93 Ω          | 1.14 Ω s <sup>-0.5</sup> | 2.77×10 <sup>-12</sup> cm <sup>2</sup> ·s <sup>-1</sup> |
| 2% CoNS   | 0.11 Ω         | 0.16 Ω | 4.45 Ω          | 0.87 Ω s <sup>-0.5</sup> | 4.72×10 <sup>-12</sup> cm <sup>2</sup> ·s <sup>-1</sup> |
| 0.5% MnNS | 0.10 Ω         | 0.18 Ω | 3.19 Ω          | 0.80 Ω s <sup>-0.5</sup> | 5.56×10 <sup>-12</sup> cm <sup>2</sup> ·s <sup>-1</sup> |
| 0.5% AgNS | 0.12 Ω         | 0.22 Ω | 4.79 Ω          | 0.92 Ω s <sup>-0.5</sup> | 4.21×10 <sup>-12</sup> cm <sup>2</sup> ·s <sup>-1</sup> |

5. Comparison of specific capacitance in this work and other previous reports.

**Table S4** Comparison of specific capacitance with similar nickel sulfides

| Samples                                                         | Specific capacitance     | Current density        | Electrolyte |
|-----------------------------------------------------------------|--------------------------|------------------------|-------------|
| PN-rGO/NCS <sup>1</sup>                                         | 1687 F g <sup>-1</sup>   | 0.5 A g <sup>-1</sup>  | 6 M KOH     |
| SnNi <sub>2</sub> S <sub>4</sub> <sup>2</sup>                   | 1483.8 F g <sup>-1</sup> | 2 A g <sup>-1</sup>    | 2 M KOH     |
| Hollow sphere NiS <sub>2</sub> <sup>3</sup>                     | 1382.0 F g <sup>-1</sup> | 1 A g <sup>-1</sup>    | 2 M KOH     |
| NiS <sub>2</sub> <sup>4</sup>                                   | 695 F g <sup>-1</sup>    | 1.25 A g <sup>-1</sup> | 3 M KOH     |
| NiS <sub>2</sub> /ZnS <sup>5</sup>                              | 1198 F g <sup>-1</sup>   | 1 A g <sup>-1</sup>    | 3 M KOH     |
| NiS-NiCo <sub>2</sub> O <sub>4</sub> @C <sup>6</sup>            | 1411 F g <sup>-1</sup>   | 1 A g <sup>-1</sup>    | 6 M KOH     |
| C@MoS <sub>2</sub> /Ni <sub>3</sub> S <sub>4</sub> <sup>7</sup> | 951.3 F g <sup>-1</sup>  | 2 A g <sup>-1</sup>    | 2 M KOH     |
| NiS/ACNTs <sup>8</sup>                                          | 1266 F g <sup>-1</sup>   | 1 A g <sup>-1</sup>    | 3 M KOH     |
| Co-NiS/NCDs <sup>9</sup>                                        | 2480 F g <sup>-1</sup>   | 1 A g <sup>-1</sup>    | 3 M KOH     |
| graphene/NiS <sub>2</sub>                                       | 478.1 F g <sup>-1</sup>  | 0.5 A g <sup>-1</sup>  | 6 M KOH     |
| NS                                                              | 2221.4 F g <sup>-1</sup> | 1 A g <sup>-1</sup>    | 2 M KOH     |
| 2% CoNS                                                         | 2874.6 F g <sup>-1</sup> | 1 A g <sup>-1</sup>    | 2 M KOH     |
| 0.5% MnNS                                                       | 2612.5 F g <sup>-1</sup> | 1 A g <sup>-1</sup>    | 2 M KOH     |
| 0.5% AgNS                                                       | 2587.3 F g <sup>-1</sup> | 1 A g <sup>-1</sup>    | 2 M KOH     |

6. Comparison of energy density as asymmetric supercapacitor in this work and other previous reports.

**Table S5** Comparison of energy density asymmetric supercapacitor with similar nickel sulfides

| Sample                                           | Energy density           | Power density            |
|--------------------------------------------------|--------------------------|--------------------------|
| N2//N2 <sup>10</sup>                             | 9.00 Wh Kg <sup>-1</sup> | 233.0 W Kg <sup>-1</sup> |
| NiCo2S4/CC//AC/CC <sup>11</sup>                  | 25.2 Wh Kg <sup>-1</sup> | 799.6 W Kg <sup>-1</sup> |
| Ni-Co LDH/STSC-0-800//a-STSC-1-600 <sup>12</sup> | 23.5 Wh Kg <sup>-1</sup> | 959.7 W Kg <sup>-1</sup> |
| Ni/Co MOF//AC <sup>13</sup>                      | 12.8 Wh Kg <sup>-1</sup> | 372.5 W Kg <sup>-1</sup> |
| NCO//AC <sup>14</sup>                            | 15.8 Wh Kg <sup>-1</sup> | 1385 W Kg <sup>-1</sup>  |
| MoS2/NiS//AC <sup>15</sup>                       | 9.80 Wh Kg <sup>-1</sup> | 1524 W Kg <sup>-1</sup>  |
| NS//rGO(this work)                               | 20.8 Wh Kg <sup>-1</sup> | 800 W Kg <sup>-1</sup>   |
|                                                  | 17.5 Wh Kg <sup>-1</sup> | 1600 W Kg <sup>-1</sup>  |
|                                                  | 10.0 Wh Kg <sup>-1</sup> | 4000 W Kg <sup>-1</sup>  |
|                                                  | 6.40 Wh Kg <sup>-1</sup> | 6400 W Kg <sup>-1</sup>  |
|                                                  | 5.33 Wh Kg <sup>-1</sup> | 8000 W Kg <sup>-1</sup>  |
| 2% CoNS//rGO(this work)                          | 36.6 Wh Kg <sup>-1</sup> | 800 W Kg <sup>-1</sup>   |
|                                                  | 31.6 Wh Kg <sup>-1</sup> | 1600 W Kg <sup>-1</sup>  |
|                                                  | 20.6 Wh Kg <sup>-1</sup> | 4000 W Kg <sup>-1</sup>  |
|                                                  | 13.2 Wh Kg <sup>-1</sup> | 6400 W Kg <sup>-1</sup>  |
|                                                  | 10.0 Wh Kg <sup>-1</sup> | 8000 W Kg <sup>-1</sup>  |
| 0.5% MnNS//rGO(this work)                        | 36.1 Wh Kg <sup>-1</sup> | 800 W Kg <sup>-1</sup>   |

|                           |                          |                         |
|---------------------------|--------------------------|-------------------------|
|                           | 31.5 Wh Kg <sup>-1</sup> | 1600 W Kg <sup>-1</sup> |
|                           | 18.9 Wh Kg <sup>-1</sup> | 4000 W Kg <sup>-1</sup> |
|                           | 12.4 Wh Kg <sup>-1</sup> | 6400 W Kg <sup>-1</sup> |
|                           | 9.11 Wh Kg <sup>-1</sup> | 8000 W Kg <sup>-1</sup> |
| 0.5% AgNS//rGO(this work) | 36.0 Wh Kg <sup>-1</sup> | 800 W Kg <sup>-1</sup>  |
|                           | 30.3 Wh Kg <sup>-1</sup> | 1600 W Kg <sup>-1</sup> |
|                           | 17.7 Wh Kg <sup>-1</sup> | 4000 W Kg <sup>-1</sup> |
|                           | 11.2 Wh Kg <sup>-1</sup> | 6400 W Kg <sup>-1</sup> |
|                           | 8.67 Wh Kg <sup>-1</sup> | 8000 W Kg <sup>-1</sup> |

---

## Reference

1. X. Hong, J. Li, G. Zhu, H. Xu, X. Zhang, Y. Zhao, J. Zhang, D. Yan and A. Yu, *Electrochimica Acta*, 2020, **362**, 137156.
2. N. I. Chandrasekaran, H. Muthukumar, A. D. Sekar, A. Pugazhendhi and M. Manickam, *Journal of Molecular Liquids*, 2018, **266**, 649-657.
3. J. Gou, S. Xie and C. Liu, *AIP Conference Proceedings*, 2017, **1794**, 020040.
4. H. Pang, C. Wei, X. Li, G. Li, Y. Ma, S. Li, J. Chen and J. Zhang, *Scientific Reports*, 2015, **4**, 3577.

5. G.-C. Li, M. Liu, M.-K. Wu, P.-F. Liu, Z. Zhou, S.-R. Zhu, R. Liu and L. Han, *RSC Advances*, 2016, **6**, 103517-103522.
6. S. Ahmad, C. Yang, W. Xie, Z. Deng, H. Zhang, Y. Zhao and X. Su, *Carbon*, 2020, **158**, 912-921.
7. S. Qin, T. Yao, X. Guo, Q. Chen, D. Liu, Q. Liu, Y. Li, J. Li and D. He, *Applied Surface Science*, 2018, **440**, 741-747.
8. Y. Ouyang, Y. Chen, J. Peng, J. Yang, C. Wu, B. Chang, X. Guo, G. Chen, Z. Luo and X. Wang, *Journal of Alloys and Compounds*, 2021, **885**, 160979.
9. Z. Ji, K. Liu, W. Dai, D. Ma, H. Zhang, X. Shen, G. Zhu and S. Wu, *Nanoscale*, 2021, **13**, 1689-1695.
10. N. Sonai Muthu and M. Gopalan, *Applied Surface Science*, 2019, **480**, 186-198.
11. T. Liu, Y. Zheng, W. Zhao, L. Cui and J. Liu, *Journal of Colloid and Interface Science*, 2019, **556**, 743-752.
12. D. Zhang, X. Guo, X. Tong, Y. Chen, M. Duan, J. Shi, C. Jiang, L. Hu, Q. Kong and J. Zhang, *Journal of Alloys and Compounds*, 2020, **837**, 155529.
13. S. Sun, M. Huang, P. Wang and M. Lu, *Journal of The Electrochemical Society*, 2019, **166**, A1799-A1805.
14. J. Bhagwan, G. Nagaraju, B. Ramulu, S. C. Sekhar and J. S. Yu, *Electrochimica Acta*, 2019, **299**, 509-517.

15. Q. Qin, L. Chen, T. Wei and X. Liu, *Small*, 2019, **15**, 1803639.
